# Supplementary material for: Matrix-trapped viruses can prevent invasion of bacterial biofilms by colonizing cells
Source: eLife. 2021 Jul 9;10:e65355. doi: 10.7554/eLife.65355 (PMC8346279; doi:10.7554/eLife.65355)
Supplement: Figure 1—figure supplement 2—source data 1. [file elife-65355-fig1-figsupp2-data1.xlsx]

## Sheet: Figure 1 - S1
Time Post Innoculation	Replicate 1	Replicate 2	Replicate 3
12	39.3921	47.5656	37.3203
36	33.4789	32.7159	26.31
62	117.511	118.848	141.567
96	405.419	507.371
