# Supplementary material for: Matrix-trapped viruses can prevent invasion of bacterial biofilms by colonizing cells
Source: eLife. 2021 Jul 9;10:e65355. doi: 10.7554/eLife.65355 (PMC8346279; doi:10.7554/eLife.65355)
Supplement: Figure 1—source data 1. [file elife-65355-fig1-data1.xlsx]

## Sheet: Figure 1 panel I
Phage Treatment	-	+	-	+
Resistant Y/N	N	N	Y	Y
	739.9	41.7797	385.6	771
	596.559	47.0592	840.2	323.4
	734.204	13.8267	93.1	90.3
	155.77	18.936	147.7	119.1
	83.7	15.1898
		16.0442

## Sheet: Figure 1 panel J
Cells Per Cluster Invading Strain (No phage pretreatment)
12.1688
11.1218
4.01093
7.30805
4.20128
4.78592
6.60784
4.20808
4.17409
9.77579
9.29992
10.4284
10.3944
2.22301
1.8763
2.6105
3.24273
16.336
3.52146
0.93815
1.42762
6.13876
4.84031
10.3128
1.64516
4.01093
1.69275
2.14823
1.8831
0.686617
0.836177
2.32498
0.761397
0.965342
4.56838
1.482
0.951746
1.54999
1.8559
2.07345
18.056
1.30525
6.02319
1.64516
0.768195
4.42562
1.08091
3.42629
3.3651
4.65676
3.89536
1.40722
1.61797
1.90349
1.80832
3.19515
3.7662
1.69275
1.61797
1.09451
2.27739
2.70568
4.79952
1.4956
0.958544
1.35964
3.3719
1.47521
4.09251
0.93815
4.96947
12.7126
0.985737
1.84911
2.12103
1.31205
0.71381
1.17609
1.1421
0.781791
1.23727
1.31885
1.95788
0.883764
1.16249
1.56358
0.836177
1.38683
0.917755
4.07891
1.17609
1.18288
5.6289
1.18968
2.71248
0.992535
1.45481
0.829379
2.18222
2.83484
1.77433
1.66556
1.35284
0.768195
134.998
3.22234
0.686617
0.754599
1.1421
6.55345
5.48614
1.67235
4.42562
1.74034
4.56838
20.7005
36.6558
2.52893
1.34604
3.89536
1.66556
2.80085
1.79472
1.40722
1.1285
3.23594
1.80152
1.63836
6.71661
3.82738
2.22981
4.1061
1.38683
5.67649
0.978939
2.70568
1.25087
0.761397
3.05239
2.40656
1.74713
1.41402
1.96468
0.774993
1.27806
4.58198
0.795388
8.34137
0.958544
0.768195
1.44122
1.5092
2.2366
1.18968
1.16929
0.679819
23.2702
0.849773
1.1285
0.727406
0.842975
1.70634
0.856571
5.40456
3.03199
1.37323
2.44735
1.44801
19.538
0.985737
4.45281
1.55678
1.43442
0.951746
2.2434
0.985737
3.80019
1.5092
3.0116
1.15569
2.02586
0.815782
0.972141
1.16929
0.727406
2.14823
1.61797
1.1149
1.1421
1.42082
1.99187
0.958544
0.795388
0.842975
0.679819
0.992535
8.55892
2.2502
1.61797
1.98507
3.59624
1.44801
2.35217
2.08024
1.53639
2.56971
0.876966
1.25766
5.54732
3.68462
1.09451
2.12103
0.78859
5.81925
2.77366
1.23727
0.700213
2.29779
4.73154
7.52559
11.7201
4.09931
6.82538
3.98374
4.73154
9.05518
3.82058
3.70501
1.57038
1.97147
1.8695
5.13943
4.94908
3.46707
2.02586
2.56292
2.57651
2.2366
2.87563
2.37937
5.56092
2.11424
4.60237
4.15369
2.42015
22.1145
1.91029
4.71794
3.3583
2.45415
2.94361
3.81378
40.8843
1.97147
2.22301
3.3719
0.815782
13.1205
8.87843
4.75873
2.97761
1.8627
1.35964
23.6713
5.07145
1.15569
13.5284
2.47454
2.49493
1.47521
4.514
1.38003
0.700213
7.72954
60.531
35.3234
2.47454
5.14623
124.855
297.223
8.54532
20.816
68.8996
5.95521
1.27126
0.985737
3.52146
2.2638
0.679819
3.26313
2.31138
16.9003
4.73834
3.66422
4.32365
5.2482
4.1401
5.96201
184
9.09597
2.73287
28.8243
8.91242
4.59557
4.1197
4.33044
9.23873
1.15569
1.05372
231.036
3.11357
100.634
13.6983
2.51533
10.5236
13.7867
1.10131
26.9344
2.78726
42.2235
13.6304
1.20328
1.5092
2.84164
1.65196
4.56158
3.93615
89.9604
4.16049
3.53506
2.06665
3.52146
5.68328
3.26313
5.97561
7.21288
1.83551
3.43988
36.6422
1.83551
8.32098
3.53506
4.72474
26.4925
7.07691
97.3024
7.57998
4.69075
2.55612
2.67849
45.4051
11.3666
11.2034
5.50653
7.57318
9.20474
22.4204
0.727406
5.70368
6.17275
1.59078
11.2442
8.43655
7.53239
1.84911
2.9844
6.32231
1.01293
16.1117
6.77099
1.42762
1.80832
3.15436
6.0028
10.544
28.7223
3.59624
0.951746
4.67715
5.39096
14.6161
3.21554
0.720608
0.781791
7.07691
0.707011
10.3604
78.2199
1.09451
5.38416
12.8894
23.5013
1.8695
2.20261
2.91642
2.90283
2.07345
1.64516
2.73967
0.71381
2.40656
5.33658
57.5059
22.8759
1.56358
1.1285
0.815782
6.94095
90.2051
3.19515
33.2771
4.36444
5.88723
2.10064
0.999333
3.05239
1.70634
3.07958
6.34271
1.57718
1.65876
16.0913
45.6226
4.71794
2.65809
0.815782
0.679819
22.9983
0.727406
0.815782
12.0056
1.25766
42.4343
0.999333
1.02653
5.72407
1.06732
1.89669
0.781791
5.82605
13.4536
0.951746
2.48814
4.59557
6.67582
3.15436
49.1441
1.40722
4.98307
1.67235
0.7478
7.1109
0.822581
0.842975
24.2763
9.76899
0.720608
0.700213
0.944948
22.9643
5.03066
1.72674
0.71381
2.30459
4.03132
6.77099
11.9784
15.629
38.2058
4.72474
3.77299
10.4352
13.0661
4.96268
6.94095
8.58611
18.4843
14.3442
18.056
5.71048
6.23394
4.28966
27.4851
12.665
7.09051
15.3639
22.0941
28.6612
6.62823
18.3687
6.98854
23.0798
14.3238
2.65809
1.61797
5.17342
5.6153
7.81791
5.996
6.88656
0.693415
24.1472
4.8879
37.5056
5.03746
16.0913
58.7159
17.3422
30.7754
19.8371
5.43855
0.754599
35.3914
2.9912
9.79619
24.9222
17.4781
16.0505
3.66422
16.2817
1.516
1.33924
6.32911
1.82871
9.12996
6.48547
3.39229
5.38416
29.6129
5.75127
14.3782
31.9175
1.38683
3.79339
16.8323
1.40043
11.7337
26.982
8.87163
1.74713
12.2027
7.47121
5.22781
2.45415
5.20741
3.51466
10.4896
41.8632
9.15036
6.96134
3.47387
5.83964
7.16529
9.03479
6.92735
20.4557
18.5862
3.44668
6.57385
2.2502
6.15916
20.2314
2.88923
5.60171
12.6378
34.1745
3.11357
11.7745
11.8017
19.0009
1.37323
10.4148
0.741002
19.1505
13.5964
1.61797
5.49973
32.2642
2.69888
1.95108
2.03266
4.62277
2.01906
11.2306
8.72887
4.4868
1.44801
6.94095
7.8723
13.3176
14.4869
7.23327
7.94708
12.4475
14.4461
37.2337
13.2633
10.476
18.0628
10.0137
32.5429
14.3102
4.98987
15.8262
11.4278
0.795388
14.7929
4.43242
26.173
12.6582
3.50107
5.28219
13.5284
6.88656
7.08371
3.01839
2.82125
3.88176
0.741002
12.4853
0.772389
0.97119
0.677877
0.945117
2.7441
1.1211
0.677877
1.00704
2.64307
1.69469
1.76965
1.43071
3.02764
6.18889
0.661582
0.772389
1.09829
0.697432
11.11
0.527962
0.795202
0.342198
1.63929
0.811497
0.655064
9.23282
2.33672
0.430191
8.46043
0.436709
0.746317
5.40998
0.827793
0.896232
0.485595
2.48012
4.10963
2.50293
4.01838
41.3961
3.35354
14.5027
1.49589
4.38339
3.81306
7.40451
2.86794
4.64411
7.02646
5.2731
0.550775
7.13727
19.502
1.01682
5.15904
2.93964
5.26984
1.58063
3.31443
14.1116
2.4899
3.52627
0.413896
1.53826
1.2091
3.36983
3.54256
1.55781
8.19971
1.31665
10.4158
5.48494
3.03089
4.00208
18.42
5.38391
2.19007
3.7544
21.226
1.28732
3.7381
4.75818
2.2194
11.8368
2.91031
1.0657
2.84513
1.93586
1.88372
1.52197
2.93964
2.28784
0.430191
0.57033
0.791943
1.24169
2.28458
0.700691
1.42745
1.90001
1.45678
1.53174
2.74084
5.07104
0.932081
0.873419
1.52848
0.342198
1.94564
22.5296
0.615956
8.29422
2.6724
3.17755
0.453005
15.174
1.70121
0.482336
4.75166
5.99987
0.342198
1.20584
0.622474
0.915786
2.3302
0.554034
2.13792
1.14066
0.726763
0.488854
0.443228
0.651805
0.410637
0.381306
0.583366
1.54804
3.94994
2.92986
0.93534
0.661582
1.56759
1.1928
0.443228
0.857124
1.5513
1.535
0.540998
0.426932
11.6217
1.53826
0.651805
0.332421
1.51545
16.3962
16.9339
1.30035
10.4158
4.34428
2.47034
1.46004
1.07874
2.73432
2.34976
11.5109
1.48612
2.24873
2.11511
4.693
2.17703
1.85113
1.9326
4.45509
5.40672
2.62677
2.15422
5.22422
9.83574
6.23452
12.7558
0.76913
4.16504
1.73054
3.84891
1.77943
2.28132
0.671359
1.95542
0.97119
3.49693
2.07274
1.36227
4.62782
7.16008
0.866901
0.984226
1.78921
0.925563
0.782166
1.3362
1.65559
1.77943
1.52197
0.384565
15.0632
3.19059
3.49693
0.410637
4.24977
1.00052
0.974449
1.08526
0.436709
4.24977
2.05645
0.472559
0.378047
1.63603
8.54842
0.475818
0.990744
1.02659
1.17977
1.23517
0.671359
1.33294
1.2808
13.01
0.443228
0.938599
2.35628
0.378047
1.19932
1.32316
1.45678
5.55664
0.63551
2.23569
2.11511
1.65559
1.15695
7.95528
1.4079
1.41442
0.439968
0.765871
2.59093
25.5866
1.91631
8.82218
6.40399
2.90379
11.7358
2.09229
2.61048
3.18081
2.4182
3.90105
6.69078
8.66901
5.17859
3.31769
3.04067
1.03637
9.49028
2.58767
2.18355
2.83535
16.4646
28.2362
0.57033
3.36331
2.4736
1.79246
0.36827
1.50893
0.655064
0.397601
1.6784
1.78921
1.24495
7.30348
13.3164
1.33294
2.23243
17.3902
1.73054
13.6162
2.16073
1.18954
13.362
1.65884
0.521444
4.12267
0.482336
0.462782
0.50189
1.14392
1.68492
0.707209
1.65559
2.77343
0.485595
1.8609
2.85817
3.32095
1.82831
0.371529
1.10807
1.52522
0.33568
0.397601
0.945117
0.544257
1.90653
1.46982
22.8327
6.70708
0.847347
15.1708
5.50124
8.36266
1.10481
11.2567
5.6707
4.14874
2.26502
25.6616
2.60396
2.38561
6.20844
1.88698
15.4869
0.860383
1.01356
1.03637
5.62834
0.681136
5.38391
12.4984
2.22266
6.3714
12.5668
3.65989
4.17807
1.01682
2.0043
1.42745
0.495372
22.132
1.55456
2.93964
0.899491
2.42472
22.4319
1.33294
3.87172
5.44257
9.89114
1.98475
1.32968
1.39812
3.8098
0.707209
3.91083
11.1785
0.974449
1.56759
1.77291
1.05918
1.51219
2.61048
1.80224
1.88372
2.36605
2.63981
0.589884
0.43345
1.16347
1.56433
0.404119
0.853865
8.06283
2.19984
2.9592
1.29383
2.64307
17.426
5.8858
12.6418
7.51531
1.92934
1.00704
3.20036
0.759353
2.87446
1.082
15.0111
6.77226
1.98475
1.66536
1.07874
2.16399
1.44049
4.48768
1.18954
2.076
0.479077
5.6316
5.67722
8.61035
11.0481
9.10246
1.96193
0.342198
1.88698
0.488854
0.632251
5.54034
3.2134
2.35302
8.64294
3.63707
0.381306
0.554034
1.30035
1.65233
6.4822
1.55781
4.67344
0.791943
7.04927
15.601
7.19593
6.63212
2.19007
10.2855
4.60826
4.34428
1.87394
6.57997
7.31651
0.93534
8.20949
22.0049
1.96519
1.65884
1.95216
4.73536
17.7324
7.57724
1.98149
4.2954
3.03089
0.915786
3.30791
3.59796
2.48664
2.63655
3.25577
2.48012
3.09607
1.48286
2.19007
1.20584
0.928822
2.617
1.77291
2.0043
1.88046
9.00143
5.40346
3.18081
1.42094
0.407378
1.99452
2.73758
0.404119
1.83483
1.66536
1.02659
1.13088
0.521444
0.824534
3.34376
3.00808
0.938599
0.531221
2.41168
2.60396
0.446487
0.355234
1.3362
1.535
1.69469
1.32968
1.74358
1.21888
0.563811
8.92973
1.09503
0.658323
0.798461
1.13414
0.915786
5.55012
0.733281
2.90053
5.69026
0.505149
3.55234
0.540998
0.466041
0.488854
0.671359
0.818015
1.63277
2.61374
0.638769
0.53448
0.456264
0.527962
0.485595
0.443228
0.36827
0.730022
0.778907
0.531221
0.56707
3.27206
0.599661
0.475818
0.818015
0.612697
0.387824
0.514926
0.586625
0.479077
0.615956
1.16021
1.63929
1.7501
0.518185
0.449746
0.739799
0.351975
0.906009
0.436709
0.638769
1.38835
0.844088
0.426932
0.818015
0.642028
1.95542
0.622474
0.628992
0.332421
0.906009
0.831052
0.57033
0.583366
3.06023
0.505149
0.53448
0.492113
0.681136
0.439968
0.537739
0.563811
0.449746
0.609438
0.716986
0.387824
0.674618
0.397601
0.628992
14.4668
1.18954
0.50189
0.589884
0.342198
8.31703
0.40086
0.495372
0.90275
0.746317
0.505149
10.3474
0.782166
0.726763
1.03963
0.472559
0.342198
3.21666
0.785425
0.329162
0.756094
19.8605
2.11185
0.765871
111.475
1.45027
0.475818
0.560552
0.413896
0.36827
4.6767
4.62782
2.20962
1.03311
0.563811
4.52679
4.01512
0.436709
0.436709
0.436709
3.22969
1.30361
0.329162
0.407378
0.563811
2.2585
18.1984
0.384565
0.50189
0.329162
0.694173
0.550775
0.762612
0.622474
27.6756
0.791943
0.355234
0.772389
0.439968
0.36827
0.586625
0.342198
0.694173
2.32369
0.550775
0.56707
0.961413
0.475818
0.492113
4.82988
11.211
0.537739
18.0257
0.498631
0.524703
0.648546
0.671359
0.342198
0.488854
0.436709
0.505149
0.4693
1.21236
5.85647
0.83757
0.804979
0.818015
1.00704
0.990744
0.756094
2.53878
0.628992
0.436709
0.387824
0.938599
1.05918
0.554034
0.53448
0.645287
15.9953
0.394342
1.08526
0.710468
0.53448
0.453005
9.50332
54.4062
0.351975
0.378047
1.81854
2.62026
0.381306
2.73106
0.462782
0.329162
0.342198
0.576848
0.338939
1.08851
0.459523
0.472559
0.456264
58.8026
2.15096
2.17703
0.743058
0.70395
2.66262
4.30843
46.0109
1.91305
17.9931
0.430191
0.475818
0.818015
0.449746
0.759353
0.967931
32.9813
0.694173
0.391083
1.29057
0.743058
3.19385
0.511667
37.7526
0.387824
0.430191
0.43345
1.24821
0.53448
1.02985
0.824534
0.43345
0.479077
0.834311
5.15904
3.38939
1.07874
1.87394
1.69143
0.332421
0.713727
0.492113
0.537739
0.850606
0.785425
0.814756
0.397601
0.941858
29.9928
0.332421
0.681136
2.97875
0.527962
1.14066
1.84787
0.56707
0.417155
1.69795
1.77617
2.24547
14.6167
15.0046
1.7338
1.94238
4.69952
17.7161
128.63
16.1843
0.586625
2.18029
1.25147
0.772389
20.6622
11.7912
3.07652
1.37205
2.58767
0.925563
0.449746
10.7711
3.82284
2.30739
0.945117
2.94616
0.505149
4.2237
0.60292
0.332421
0.505149
0.407378
0.394342
0.628992
0.410637
0.423673
0.332421
0.677877
23.8365
0.76913
0.397601
0.713727
0.56707
20.5938
1.00704
0.723504
2.33346
0.677877
6.14326
0.795202
0.446487
0.514926
0.961413
0.443228
5.16881
0.628992
2.37257
0.410637
1.01356
0.93534
2.62677
0.456264
25.4595
0.606179
0.642028
0.80172
1.24169
0.977708
1.52197
0.645287
0.492113
1.17325
0.479077
2.72129
2.0597
1.16673
0.622474
122.771
40.1251
3.90105
8.37896
2.87772
2.88424
1.13414
1.18954
0.417155
4.71907
0.417155
0.53448
2.80602
0.482336
4.41924
0.511667
3.38613
0.544257
1.84461
0.423673
0.713727
2.44101
12.7754
0.733281
0.928822
2.80276
31.6745
1.97823
1.64581
1.40138
2.29435
14.5124
4.37035
1.86742
1.18303
1.51219
15.966
0.466041
9.92047
1.46982
1.16673
3.01134
0.371529
0.866901
3.79351
3.92387
0.404119
3.02438
1.69143
0.651805
0.844088
0.580107
0.90275
0.60292
0.707209
0.906009
7.06883
0.632251
0.593143
0.6681
0.413896
0.642028
1.33946
0.619215
0.554034
0.765871
0.922304
0.397601
1.75336
0.710468
0.410637
0.430191
3.75766
5.09712
0.537739
0.576848
1.27754
1.78595
9.62716
0.417155
0.508408
0.658323
0.374788
0.743058
33.1508
0.63551
34.5163
1.75987
0.342198
0.417155
0.488854
0.609438
0.746317
0.83757
1.02985
0.60292
0.56707
0.351975
0.700691
30.4295
0.791943
6.09438
6.5702
0.355234
1.51219
1.70121
11.4718
7.5642
82.3458
0.505149
5.52079
4.71255
2.76365
0.426932
0.560552
38.8085
8.43762
2.52575
2.64959
3.25251
0.550775
0.524703
0.557293
0.710468
1.54804
2.19984
3.50997
3.44153
3.8098
9.77382
2.27154
3.84891
0.338939
2.10859
2.28784
5.07756
0.453005
0.394342
0.505149
4.10311
3.65663
3.3959
6.02594
4.66367
0.749576
0.560552
2.23569
2.4182
0.948377
0.436709
15.1642
0.413896
0.518185
0.681136
0.475818
0.404119
0.36827
0.638769
0.573589
0.619215
0.951636
0.449746
5.65441
5.23725
3.20036
0.824534
0.642028
0.684395
0.583366
6.4985
0.889714
0.521444
2.59418
1.1374
0.40086
0.488854
0.690913
0.681136
0.384565
2.18681
0.459523
0.384565
0.540998
0.583366
0.928822
0.632251
0.361752
0.752835
2.8875
17.5727
3.83261
2.01082
0.407378
0.980967
0.332421
0.57033
0.417155
0.426932
7.8184
0.466041
1.4079
0.475818
0.397601
1.54478
1.46982
0.50189
0.345457
505.208
299.286
2.35953
19.2348
238.456
171.395
4.25629
11.0351
3.43501
72.4221
108.389
7.26763
5.44257
0.775648
2.82232
65.1088
2.25525
0.342198
61.915
2.58441
17.7487
3.99231
2.20962
0.612697
24.5665
4.16178
18.9317
5.40021
0.384565
8.00417
0.404119
4.56915
1.78595
1.73706
13.1502
0.43345
5.5599
0.642028
28.5719
1.55781
9.04054
2.15748
2.22266
0.573589
21.2423
1.71099
11.7032
18.13
6.38769
2.61048
1.52848
1.30361
2.8158
0.459523
2.29761
15.4185
18.7883
4.30843
1.73054
0.508408
2.00756
0.384565
14.2256
3.02438
14.1409
1.18629
34.3762
7.15682
6.83092
2.06296
6.75596
2.21614
1.37531
1.36879
0.453005
1054.81
20.9099
48.9734
19.8833
118.231
8.43762
1.37531
31.7885
1.4796
0.661582
6.29318
41.2299
0.886455
2.91683
60.5527
3.93039
18.2962
14.4733
1.31339
97.9761
341.142
0.980967
7.94225
250.981
2.82232
11.1915
26.7794
2.67892
6.65493
107.815
1.85439
151.577
1.86742
39.8481
6.06505
3.5393
2.52249
4.22044
0.606179
2.61048
18.7198
4.78099
0.557293
17.7389
60.2072
2.91683
2.45405
0.456264
0.70395
1.68492
0.479077
0.700691
3.0863
0.821275
3.37309
0.521444
3.93039
3.37961
0.723504
0.518185
0.420414
0.43345
1.1211
1.86416
0.394342
0.511667
211.713
2.46382
0.466041
0.387824
0.365011
11.4424
2.92335
1.70773
72.6828
0.782166
8.28444
0.808238
0.345457
0.622474
1.99452
4.28888
0.410637
0.726763
0.384565
2.45731
1.11785
0.60292
156.234
23.843
0.430191
2.29761
1.4633
0.413896
0.417155
0.345457
0.453005
154.374
0.43345
2.24873
0.404119
0.531221
0.456264
16.3342
0.57033
0.798461
0.374788
0.453005
0.443228
0.716986
2.87772
44.9517
143.971
4.49094
0.479077
45.9881
1.40138
30.3872
7.13401
0.674618
34.4642
4.14548
73.0739
42.8464
105.407
1.29057
60.1942
0.847347
1.51871
29.4844
3.16777
2.67892
8.08238
3.52301
1.2645
0.674618
3.24925
0.358493
238.192
79.3312
71.2749
84.4153
160.24
490.138
47.4351
169.072
7.55116
162.857
493.009
91.5004
13.0133
29.4029
3.93364
1.92934
11.9932
0.974449
0.329162
46.4476
17.3217
17.527
1.63929
2.83535
89.1344
61.1784
1.7501
0.479077
1.84461
0.850606
342.468
20.8121
0.687654
0.413896
0.850606
2.55182
72.6176
1.38509
0.821275
13.8639
19.4694
1.83157
0.889714
1.3525
3.67292
1.35901
4.20088
6.90588
6.02594
1.60018
4.77447
0.498631
0.925563
2.75062
19.2445
13.8867
1.14066
5.43606
0.73654
1.29709
0.593143
3.90431
0.739799
1.66862
146.94
227.979
139.623
58.5647
17.0708
44.6421
2.14444
0.407378
0.87016
22.2722
3.21014
0.462782
0.739799
31.0976
2.09881
0.518185
0.521444
0.860383
0.831052
214.375
0.514926
1.07222
0.945117
1.97823
85.2203
0.420414
2.66588
3.72833
0.645287
0.850606
1.1928
0.661582
1.38509
33.6625
16.595
0.720245
1.37205
4.19763
0.540998
1.59692
0.896232
0.33568
1.05918
0.661582
0.514926
3.65663
0.844088
0.554034
1.29383
15.9888
1.77617
0.342198
0.90275
0.436709
4.99935
7.13727
0.404119
0.391083
0.426932
0.941858
0.951636
0.439968
[truncated: 3,786 more rows]

## Sheet: Figure 1 panel K
Cells Per Cluster Invading Strain (Yes phage pretreatment)
0.715275
0.340859
0.747065
0.573986
1.35814
0.245489
0.717041
1.98511
0.362053
2.38602
0.639332
0.498043
2.30478
0.57222
0.406206
0.512172
0.358521
3.83599
0.602244
0.344392
0.397375
1.48707
0.354988
0.671122
1.76435
7.75853
1.9233
2.79046
6.2485
2.86993
3.43685
5.34425
0.533366
2.03633
0.611075
1.35108
1.07733
5.75222
0.983724
1.00315
0.854798
0.588115
0.824774
0.992555
0.513938
0.538664
0.60401
0.575752
2.39485
0.937805
0.460955
0.766492
1.22745
1.85618
27.0939
8.46674
3.82716
7.17571
28.4344
12.9067
1.84205
3.39623
3.02182
6.56287
0.427399
8.60273
2.92998
1.83146
17.5958
0.939571
4.48239
1.48177
7.63137
2.61914
3.97905
4.0391
4.92039
3.69117
2.2253
12.0837
0.452125
3.2726
6.38449
4.14506
1.39523
3.86425
2.99709
2.44606
6.41628
1.72196
2.0275
0.800048
2.69685
1.10735
5.86526
0.498043
6.26793
4.90626
7.28521
7.1969
5.10406
4.2316
3.4916
4.37819
8.46497
1.26983
6.87194
1.01728
4.88854
7.13401
4.26281
2.82558
2.25525
7.54139
2.24547
3.95646
4.64085
1.93586
6.56694
6.07482
4.08356
6.50827
2.96571
3.97927
3.84891
0.752835
5.0189
6.3551
11.2567
6.32577
4.98305
2.2194
7.22852
4.693
7.38169
4.08356
26.6197
7.86729
9.11875
3.37961
3.29813
8.58427
1.6621
2.67566
5.19163
30.0287
5.08082
4.03467
0.374788
2.45079
4.95372
0.922304
3.74136
4.76144
0.831052
2.35953
8.74723
0.371529
1.1211
13.5152
1.6067
3.71203
4.63108
34.9172
4.05097
6.72337
7.53487
3.63707
5.11015
3.93039
18.5276
3.07326
5.94772
8.61035
7.26437
6.90588
3.98905
1.79246
12.3647
4.39968
2.40516
6.15304
2.55508
13.4891
9.02098
5.02868
0.56707
3.07
1.13414
1.05918
1.02985
0.573589
0.844088
3.45783
1.73706
3.27532
0.762612
3.02764
0.775648
4.20414
3.42524
3.85217
4.61478
3.40894
0.615956
2.50293
6.769
0.453005
3.00156
1.38183
0.387824
0.505149
3.16126
3.9369
2.88098
4.86573
1.53174
0.912527
0.355234
0.436709
2.29761
13.7694
12.5538
1.64255
5.46213
3.04393
0.374788
3.72181
3.28184
4.0966
1.56433
3.26554
1.62625
5.26007
1.15044
0.325903
1.58063
0.361752
0.381306
0.508408
0.612697
0.857124
5.85321
4.38665
5.24703
3.87824
11.3805
5.81736
2.40842
1.37205
3.63707
2.59744
4.5659
2.15422
1.02008
0.485595
10.7906
2.6007
0.439968
4.88202
6.71685
3.02764
3.81958
5.2177
3.14496
4.30191
8.30726
3.60774
4.68322
3.9369
3.07326
4.17155
5.52405
10.1388
2.92986
2.50945
5.47842
5.21118
3.59796
3.92713
0.651805
0.387824
9.07313
3.28184
9.88137
2.40842
2.14118
7.37843
21.1185
3.94342
6.74944
4.64411
3.84239
2.64633
5.19163
3.11563
5.68374
4.71255
3.94668
4.15526
3.17103
4.39317
8.46043
3.43501
5.99335
3.49368
4.8755
3.04067
4.17155
4.2074
5.60227
2.21288
11.5695
3.10585
6.28666
2.55182
6.58323
4.57567
9.44792
6.43658
1.35901
0.430191
1.02008
0.977708
1.58389
2.76365
2.0043
5.27636
5.40021
8.34311
16.8296
25.7365
4.52679
2.21614
8.72441
30.6902
4.8918
10.279
1.78269
3.57841
7.41428
3.48064
5.72285
3.87498
6.2117
4.27258
0.325903
1.97171
4.27584
3.4839
3.50997
6.74292
3.26228
2.15096
3.10911
10.4875
4.41924
1.77617
5.26659
2.17377
2.7278
18.9512
6.56368
2.7995
0.365011
6.21822
9.35666
3.57515
86.2012
19.4042
14.6656
7.01668
11.8857
64.6623
6.03897
12.2018
11.0253
1.08851
5.03194
4.03467
43.0778
3.72507
5.42628
4.06075
11.5044
1.85439
3.99557
5.24051
4.83965
4.96676
2.80928
3.88802
10.9568
6.62234
1.40464
5.62182
5.48494
0.684395
1.74032
3.80002
3.40242
5.38065
1.96845
3.59471
12.5407
3.51649
6.43006
8.11823
2.98527
1.34598
2.18681
6.46591
1.5513
2.06296
1.07222
0.583366
0.518185
0.50189
2.72455
5.80433
2.47034
3.64685
1.60344
0.420414
0.997262
29915.1
0.374788
0.713727
0.436709
0.387824
0.798461
1.34272
0.488854
0.547516
2.12488
1.84787
0.593143
1.11459
1.04289
0.505149
1.50241
1.08526
0.723504
0.700691
0.345457
1.40138
0.743058
2.48664
0.371529
1.11459
0.430191
6.50176
0.596402
0.348716
0.439968
0.664841
0.622474
0.397601
0.33568
0.710468
5.38065
0.53448
0.407378
2.38561
0.632251
1.62951
0.361752
0.80172
0.342198
1.71099
0.850606
0.472559
0.707209
0.945117
0.498631
0.462782
1.36227
0.576848
0.664841
0.863642
0.788684
0.361752
0.508408
0.90275
0.589884
1.15044
0.417155
3.71203
0.417155
0.33568
0.342198
0.589884
0.410637
0.498631
2.18355
1.54478
2.12488
8.57776
2.97549
0.892973
1.14392
0.834311
5.17207
0.938599
0.795202
1.17325
0.889714
0.586625
1.14718
0.954895
3.40242
1.37205
1.16673
23.3672
1.22213
1.87394
0.527962
6.40399
0.958154
1.26124
0.482336
0.459523
0.850606
1.31665
2.14444
0.632251
5.82714
1.37205
0.407378
0.365011
0.466041
0.332421
0.436709
1.31339
0.407378
0.417155
0.413896
0.378047
20.2483
0.677877
2.617
2.31717
0.560552
2.0206
2.61048
0.537739
1.23843
0.466041
1.16021
0.57033
0.342198
1.13414
0.404119
5.4719
0.808238
0.615956
0.580107
0.358493
1.02985
1.09829
1.3916
2.12488
0.733281
1.05918
0.413896
0.716986
1.10155
0.338939
1.31013
10.5234
1.51219
0.824534
0.361752
0.397601
1.60996
0.394342
1.17651
0.984226
0.371529
1.43723
0.563811
0.622474
0.57033
0.50189
1.02008
3.71855
1.32642
0.560552
0.544257
0.899491
0.371529
1.44701
0.443228
0.459523
0.365011
8.31052
0.365011
1.43723
0.365011
0.70395
6.54086
0.374788
1.70773
0.338939
1.02333
11.3349
1.31991
0.824534
5.75544
1.56107
0.964672
1.85764
0.358493
2.41168
2.88098
2.35953
0.906009
0.521444
2.00756
0.593143
0.824534
2.04015
0.407378
1.02008
0.674618
0.853865
1.54152
5.03845
5.04171
0.994003
0.358493
0.557293
0.684395
1.76313
1.80224
0.80172
4.80706
0.583366
0.860383
1.53826
4.22696
6.47568
0.537739
1.082
0.684395
0.332421
1.11459
0.638769
0.847347
0.413896
0.394342
0.697432
1.68492
3.39916
0.485595
0.76913
0.338939
2.36279
0.443228
1.8055
0.925563
0.892973
3.64033
0.814756
1.31013
0.472559
0.4693
3.54256
0.778907
0.423673
2.25525
15.2881
0.492113
0.690913
3.43827
0.723504
0.43345
0.625733
2.66914
2.73758
6.04223
1.14718
1.94238
1.09829
1.51219
0.475818
0.426932
0.883196
0.655064
0.860383
0.765871
10.4158
1.03963
0.537739
4.5659
0.671359
1.2645
0.6681
1.82831
1.75336
0.446487
1.02659
1.32316
0.57033
3.50345
1.18629
3.91735
0.932081
1.92608
0.394342
0.723504
0.945117
0.446487
0.40086
1.58715
0.338939
0.420414
0.557293
1.43397
2.81906
0.811497
1.06896
0.443228
0.707209
0.524703
2.83209
2.19007
2.59418
0.925563
2.03037
0.449746
1.44049
0.80172
1.00052
0.430191
0.404119
1.11459
7.88684
0.33568
0.746317
0.671359
0.651805
0.355234
2.71803
1.10807
0.609438
4.46161
0.612697
0.632251
1.2808
0.511667
0.791943
0.576848
0.53448
0.609438
0.83757
1.36553
0.426932
0.73654
0.814756
0.583366
1.28406
0.560552
0.407378
1.30035
0.834311
3.32421
2.80276
0.466041
1.6067
0.527962
4.31169
1.00378
0.612697
0.485595
0.863642
2.4182
1.81202
1.29057
0.50189
0.449746
0.720245
1.4079
0.707209
0.586625
0.879937
0.511667
0.482336
0.76913
0.365011
0.93534
0.348716
3.77395
0.325903
0.355234
1.15695
0.560552
1.12436
0.83757
4.34102
0.550775
8.12149
0.404119
0.358493
0.563811
1.83483
0.521444
0.43345
0.853865
0.948377
2.86142
1.14066
1.02008
0.886455
0.576848
0.638769
0.632251
0.677877
0.56707
0.563811
0.671359
0.394342
0.329162
0.338939
0.615956
0.73654
0.351975
0.632251
0.606179
0.351975
2.27154
0.374788
0.374788
0.733281
0.756094
0.40086
0.928822
0.479077
1.9326
1.91631
0.967931
1.0657
0.33568
0.664841
5.85647
0.423673
0.980967
0.606179
0.374788
7.84773
1.27428
0.453005
3.55234
0.690913
0.795202
5.03194
0.638769
0.348716
0.439968
5.11667
2.86794
0.57033
0.391083
0.700691
0.430191
0.338939
0.645287
0.909268
0.733281
0.896232
1.42419
1.6067
0.808238
0.426932
0.906009
0.488854
0.606179
0.381306
0.40086
0.638769
0.439968
0.439968
0.879937
1.60018
0.752835
8.58102
0.485595
0.615956
1.72728
0.925563
0.642028
0.43345
3.36331
3.79025
1.21562
0.462782
0.342198
1.09829
1.07548
0.462782
2.44101
0.50189
1.00378
1.90001
1.02333
0.43345
0.387824
0.338939
0.4693
0.472559
1.27102
0.348716
0.83757
0.671359
0.531221
1.05918
1.81528
0.381306
1.86742
0.730022
0.980967
0.76913
0.511667
1.17651
1.082
0.697432
1.17651
1.24169
0.615956
1.38835
0.863642
1.55781
0.583366
0.866901
3.56863
0.638769
0.495372
0.866901
1.082
0.394342
0.365011
0.70395
0.391083
0.697432
0.531221
0.690913
0.743058
0.498631
0.43345
0.619215
2.27806
0.593143
0.700691
0.583366
0.580107
2.46382
1.42094
1.05592
0.700691
2.33672
0.426932
6.08134
5.72937
0.628992
0.980967
0.599661
0.677877
0.492113
0.892973
0.498631
0.355234
2.04015
0.853865
0.342198
0.325903
0.387824
0.827793
0.374788
0.73654
0.540998
0.423673
0.332421
0.338939
1.05592
0.527962
1.26776
0.36827
2.53226
0.423673
4.06401
0.899491
0.866901
0.87016
0.606179
0.795202
0.746317
0.332421
0.537739
0.518185
0.821275
0.876678
0.886455
1.04289
1.15695
0.423673
0.332421
0.664841
0.593143
1.67188
0.485595
1.2808
0.378047
2.92986
0.733281
0.439968
0.899491
0.661582
0.33568
0.453005
1.38835
0.589884
0.57033
2.62026
0.97119
0.423673
0.4693
0.394342
0.990744
0.57033
0.365011
0.527962
0.338939
0.547516
0.57033
0.791943
0.521444
1.00378
0.342198
0.606179
0.909268
0.404119
0.449746
0.43345
2.49641
1.03311
1.14066
0.896232
0.560552
0.547516
0.417155
0.482336
1.19606
0.430191
2.30087
1.6621
0.488854
0.984226
0.33568
0.632251
0.677877
0.554034
0.397601
3.80328
2.12163
0.456264
0.36827
0.697432
0.381306
0.785425
0.387824
0.345457
0.651805
0.818015
1.00378
0.586625
1.81202
0.358493
0.355234
0.697432
1.92283
0.514926
1.67514
1.27102
0.365011
0.381306
3.18081
0.361752
0.648546
0.404119
0.426932
0.580107
1.68818
1.42094
0.329162
2.20636
1.16021
1.4633
1.32642
2.39538
0.671359
0.80172
0.70395
0.707209
0.384565
0.351975
2.39212
1.1928
0.332421
0.475818
1.22539
1.02008
0.964672
0.655064
0.449746
0.615956
0.716986
0.847347
0.420414
0.840829
3.48064
0.889714
0.338939
3.20036
1.13414
0.420414
0.759353
1.51871
1.58063
1.07874
1.14392
1.69469
0.420414
0.426932
0.544257
0.436709
0.361752
0.622474
0.36827
0.426932
0.397601
0.479077
0.456264
0.531221
0.495372
1.0103
0.677877
3.20362
0.550775
0.33568
0.420414
0.345457
0.495372
0.844088
0.410637
1.45353
0.40086
0.446487
0.338939
0.351975
0.593143
0.329162
1.88372
0.384565
0.756094
0.378047
0.404119
0.746317
0.453005
0.759353
0.632251
0.596402
0.472559
0.658323
0.404119
2.86468
0.674618
0.860383
0.348716
0.531221
0.498631
1.93586
0.355234
1.77943
0.384565
1.60996
0.374788
0.746317
0.498631
1.16347
0.462782
0.687654
0.514926
0.713727
0.756094
1.03637
0.560552
0.345457
0.550775
2.2031
0.351975
1.07222
1.97171
0.544257
0.36827
0.40086
1.14066
0.351975
0.413896
0.527962
0.762612
0.876678
0.342198
0.505149
0.511667
0.831052
0.50189
0.466041
0.426932
1.59692
1.41442
0.664841
0.488854
0.371529
0.544257
0.544257
0.697432
0.782166
0.436709
1.23843
0.348716
0.381306
0.716986
0.586625
0.628992
0.694173
1.18303
0.420414
0.332421
0.355234
0.50189
1.27754
0.449746
1.1928
0.690913
0.700691
0.922304
0.50189
0.531221
0.325903
0.560552
0.508408
0.466041
1.06244
0.345457
0.97119
0.443228
0.521444
0.410637
0.378047
0.821275
0.511667
0.361752
0.576848
0.53448
0.371529
0.33568
0.436709
0.325903
0.449746
0.687654
0.365011
1.93586
0.338939
0.563811
19.0979
1.08526
3.44805
0.381306
0.622474
9.37622
0.420414
1.5513
0.6681
2.23569
8.7016
18.1169
4.94394
0.648546
2.2911
1.10155
9.66953
0.752835
1.18629
11.475
0.53448
0.687654
2.71803
0.492113
0.80172
8.1052
1.63929
1.60344
2.80602
3.25251
4.79403
3.65989
0.462782
2.66262
0.498631
0.80172
0.511667
1.30035
1.1374
2.65611
0.622474
0.329162
0.554034
2.39864
3.47738
0.456264
0.658323
1.00378
0.56707
5.68374
3.70225
1.20584
5.40998
2.10207
0.443228
1.53826
1.04941
16007.6
0.374788
3.48716
1.56107
0.40086
0.642028
0.906009
0.521444
1.68492
0.628992
6.5539
0.749576
0.759353
0.827793
1.15695
1.00704
0.554034
1.31013
1.72077
0.759353
0.720245
0.521444
0.342198
0.625733
1.23843
0.332421
0.638769
2.40516
2.33346
0.863642
0.537739
0.325903
1.49263
0.743058
0.358493
8.40829
0.498631
0.76913
1.74684
1.97171
0.521444
0.462782
2.46708
1.95867
0.348716
2.54856
1.38835
1.07222
0.818015
0.632251
0.511667
0.397601
0.417155
0.430191
0.83757
13.2708
0.495372
1.24169
1.96193
0.36827
0.378047
0.948377
2.63655
0.443228
0.4693
0.325903
2.34324
2.12163
0.56707
1.89023
0.547516
0.358493
0.391083
0.342198
0.941858
1.10481
4.73862
0.759353
1.07874
0.739799
0.681136
0.36827
1.00378
5.08082
1.2645
3.35028
1.93586
0.896232
0.50189
0.342198
0.384565
5.26984
4.42902
3.98905
0.325903
2.56485
1.68166
1.54152
0.43345
2.43775
2.96245
1.04289
0.873419
8.845
1.34598
0.355234
3.22318
12.9351
0.430191
0.475818
1.18303
0.345457
0.342198
1.34272
0.466041
0.625733
0.860383
1.55456
0.365011
0.485595
0.834311
4.91787
1.29709
1.28732
0.420414
0.531221
1.00704
0.886455
2.08578
0.413896
1.85113
0.804979
6.12697
0.348716
0.40086
1.73706
0.430191
0.511667
2.03689
2.00756
1.07548
0.325903
7.45339
0.557293
0.697432
0.550775
0.505149
0.651805
1.3525
1.9489
0.475818
1.082
0.684395
0.423673
0.446487
0.615956
3.91409
0.355234
0.472559
0.4693
5.15578
7.25133
0.557293
0.596402
0.492113
0.713727
0.40086
0.560552
0.655064
1.47634
0.466041
1.51871
0.651805
0.994003
1.11785
0.351975
1.85113
2.80928
1.93912
0.615956
1.66536
0.6681
10.3507
0.505149
0.544257
0.554034
0.615956
1.87394
2.12163
1.18303
0.808238
0.407378
0.453005
0.879937
0.899491
1.09503
0.4693
0.505149
0.749576
1.3525
1.3916
1.33946
1.1928
1.16999
0.547516
0.824534
2.67566
0.329162
0.33568
0.961413
0.456264
1.36227
0.606179
0.632251
0.394342
0.527962
4.53656
0.63551
1.4079
0.762612
1.06244
1.27102
0.420414
7.32955
0.394342
0.573589
0.762612
0.325903
0.338939
0.606179
2.41168
2.17377
0.462782
0.436709
10.4256
0.456264
1.41768
0.63551
0.716986
1.45353
14.3136
0.36827
0.43345
0.56707
0.342198
0.43345
1.09177
1.01682
7.45665
0.821275
0.358493
1.44049
0.505149
0.4693
0.87016
1.71099
1.16999
0.687654
0.772389
0.772389
1.00378
10.5755
4.84291
0.593143
1.2808
0.479077
0.345457
3.67618
0.371529
0.778907
0.371529
0.63551
0.475818
3.09282
0.642028
1.08851
0.505149
2.04993
0.76913
0.938599
1.0103
2.97875
1.12436
0.710468
1.9489
1.57737
0.606179
0.472559
10.8526
0.576848
1.22865
1.35575
0.713727
0.6681
0.355234
0.73654
0.977708
0.508408
0.459523
2.73106
0.834311
1.63603
0.772389
0.338939
0.547516
13.5901
0.655064
0.394342
0.479077
0.899491
1.09177
0.938599
0.511667
0.524703
0.436709
5.52079
6.37791
0.655064
1.55781
1.49263
7.06231
0.733281
0.726763
0.964672
0.325903
0.80172
0.586625
21.5226
0.625733
13.2675
1.50567
0.909268
0.576848
0.410637
0.671359
0.420414
0.361752
0.426932
5.42954
1.14718
2.44753
0.505149
0.808238
0.713727
0.690913
0.831052
0.378047
0.70395
1.43723
1.40464
0.420414
1.30035
0.342198
0.413896
0.423673
0.547516
0.550775
0.661582
0.365011
0.413896
0.57033
1.05918
0.33568
1.6067
2.44753
0.387824
0.351975
4.60826
4.17807
2.0206
1.81854
5.70004
4.92765
1.30687
0.573589
0.899491
0.73654
0.785425
3.61752
0.899491
0.677877
1.84135
0.994003
0.329162
1.25798
0.453005
1.28406
0.358493
0.446487
0.453005
0.365011
1.05592
0.788684
0.540998
0.782166
1.01356
1.1537
0.661582
0.625733
1.17651
0.844088
1.48286
0.928822
0.443228
0.958154
0.332421
0.488854
0.876678
0.365011
0.892973
0.456264
0.700691
1.01682
1.34272
0.410637
0.612697
0.332421
0.394342
7.58375
0.906009
1.36227
0.896232
0.381306
1.28406
0.466041
3.15474
0.423673
4.02164
0.36827
0.449746
1.32968
1.6621
0.651805
0.632251
0.430191
0.430191
0.554034
0.407378
0.90275
0.374788
1.54478
6.34858
0.700691
0.348716
0.661582
0.827793
0.426932
0.40086
1.12762
0.90275
0.883196
0.329162
0.371529
0.876678
0.36827
0.488854
0.426932
0.325903
1.21236
1.07222
0.329162
0.355234
0.655064
0.345457
0.658323
0.762612
0.508408
1.14718
4.35732
1.38835
4.40294
11.5989
0.423673
4.18459
71.6921
4.45835
1.98475
13.5967
4.11615
2.20962
1.2808
3.38287
0.378047
4.32473
1.56759
2.34324
0.694173
35648.2
0.70395
0.811497
0.351975
3.89454
0.527962
2.32694
17.0871
0.394342
37.7819
0.573589
5.30244
0.413896
3.78047
3.0146
0.56707
1.79898
0.606179
5.687
0.365011
10.7483
0.785425
0.599661
0.439968
0.498631
0.694173
3.35028
0.351975
0.43345
2.80276
0.879937
0.404119
0.596402
0.915786
1.17651
1.25798
0.749576
0.361752
0.479077
0.681136
1.55456
1.05592
1.08851
0.358493
0.785425
0.961413
0.619215
3.54908
0.410637
0.391083
1.50893
66.2951
0.374788
0.351975
0.495372
10.2073
0.394342
0.883196
2.59418
3.20036
0.521444
1.23843
4.07704
0.33568
0.6681
0.615956
1.16347
0.420414
7.65545
5.4882
0.342198
0.827793
1.25798
2.30413
2.10207
0.625733
3.48064
1.54804
1.87394
0.961413
8.2877
0.648546
1.02333
0.596402
0.446487
0.60292
1.1537
1.20258
0.527962
1.5513
0.430191
1.97497
0.964672
0.554034
0.462782
0.586625
0.674618
0.798461
11.84
2.02711
0.589884
1.46982
24.4622
1.07222
1.57411
8.86455
0.827793
0.475818
1.12436
2.83535
0.554034
0.482336
4.19111
6.90913
0.355234
0.33568
2.66914
0.482336
0.619215
0.361752
0.33568
0.453005
0.371529
1.06896
2.88098
0.495372
0.674618
0.716986
2.76691
1.23517
0.410637
0.879937
0.397601
0.329162
0.527962
1.08526
0.361752
0.329162
0.361752
0.391083
0.50189
0.97119
0.554034
0.374788
1.64581
1.43397
0.332421
0.36827
0.625733
0.606179
0.821275
0.423673
0.351975
0.345457
1.69469
1.10481
0.325903
0.351975
1.22213
0.524703
0.446487
0.508408
0.332421
0.407378
4.72233
0.361752
2.20962
0.371529
0.355234
0.332421
0.365011
0.36827
0.426932
0.387824
0.671359
0.430191
0.658323
0.63551
0.472559
1.82831
0.365011
[truncated: 1,756 more rows]
