# Supplementary material for: Matrix-trapped viruses can prevent invasion of bacterial biofilms by colonizing cells
Source: eLife. 2021 Jul 9;10:e65355. doi: 10.7554/eLife.65355 (PMC8346279; doi:10.7554/eLife.65355)
Supplement: Figure 2—source data 1. [file elife-65355-fig2-data1.xlsx]

## Sheet: Figure 2 panel A
Phage Pulse Delay	0 h	10 h
	3.3	50.9
	7.4	894.1
	7.4	49
	20.8	495.7
	25	1149.7
	2.6	46.4
	42	77
		96
		45.1
		166.4
		954
