# Supplementary material for: Matrix-trapped viruses can prevent invasion of bacterial biofilms by colonizing cells
Source: eLife. 2021 Jul 9;10:e65355. doi: 10.7554/eLife.65355 (PMC8346279; doi:10.7554/eLife.65355)
Supplement: Figure 3—figure supplement 2—source data 1. [file elife-65355-fig3-figsupp2-data1.xlsx]

## Sheet: Figure 3 - S2
Phage Pulse Delay	0 h	10 h
	6.70382	12.8275
	5.89558	20.5547
	20.4634	200.313
	81.0943	263.476
	0.449746	64.2028
	14.9035	224.374
	0	348.165
	92.3347	632.557
	6.06179	665.568
	3.64685	180.025
	170.89	439.326
	104.657	280.706
	12.5538	43.7394
	1.72402	110.771
	37.733	430.873
	214.261	318.782
