# Supplementary material for: Matrix-trapped viruses can prevent invasion of bacterial biofilms by colonizing cells
Source: eLife. 2021 Jul 9;10:e65355. doi: 10.7554/eLife.65355 (PMC8346279; doi:10.7554/eLife.65355)
Supplement: Figure 3—source data 1. [file elife-65355-fig3-data1.xlsx]

## Sheet: Figure 3 panel B
Time	Invader						Time	Resident
	Replicate 1	Replicate 2	Replicate 3	Replicate 4				Replicate 1	Replicate 2	Replicate 3
0	60.1101	26.8792	6.84944	25.6384			0	284.007	29.9037	201.118
1	67.8956	27.0124		50.6973			1	294.698	37.7248	215.754
2	86.4371	31.2173	10.2367	51.2042			2	322.134	41.6972	235.791
3	87.048	33.953	14.9091	50.545			3	364.425	48.0619	234.69
4							4	365.884	60.7977	262.211
5		68.0094	6.12782	40.8			5
6	59.3858	72.9172	21.3034	143.225			6	424.139	78.9857	319.67
7	79.9826	107.256	29.9908	72.2034			7	439.368	116.638	349.937
8	84.5279	132.463	36.745	44.3214			8	466.655	145.741	376.832
9	108.758	146.391	46.1592	71.2337			9	496.41	145.299	368.271
10	150.543	163.16	55.0143	36.8044			10	549.43	187.296	411.11
11	180.867	222.736	78.7144				11	521.107	222.907	429.967
