# Supplementary material for: Matrix-trapped viruses can prevent invasion of bacterial biofilms by colonizing cells
Source: eLife journal article supplement (doi:10.7554/elife.65355), 2021-07-09
Supplement: supp [file elife_poa_e65355_Figure_1_figure_supplement_2.pdf › elife_poa_e65355_Figure_1_figure_supplement_2.pdf]

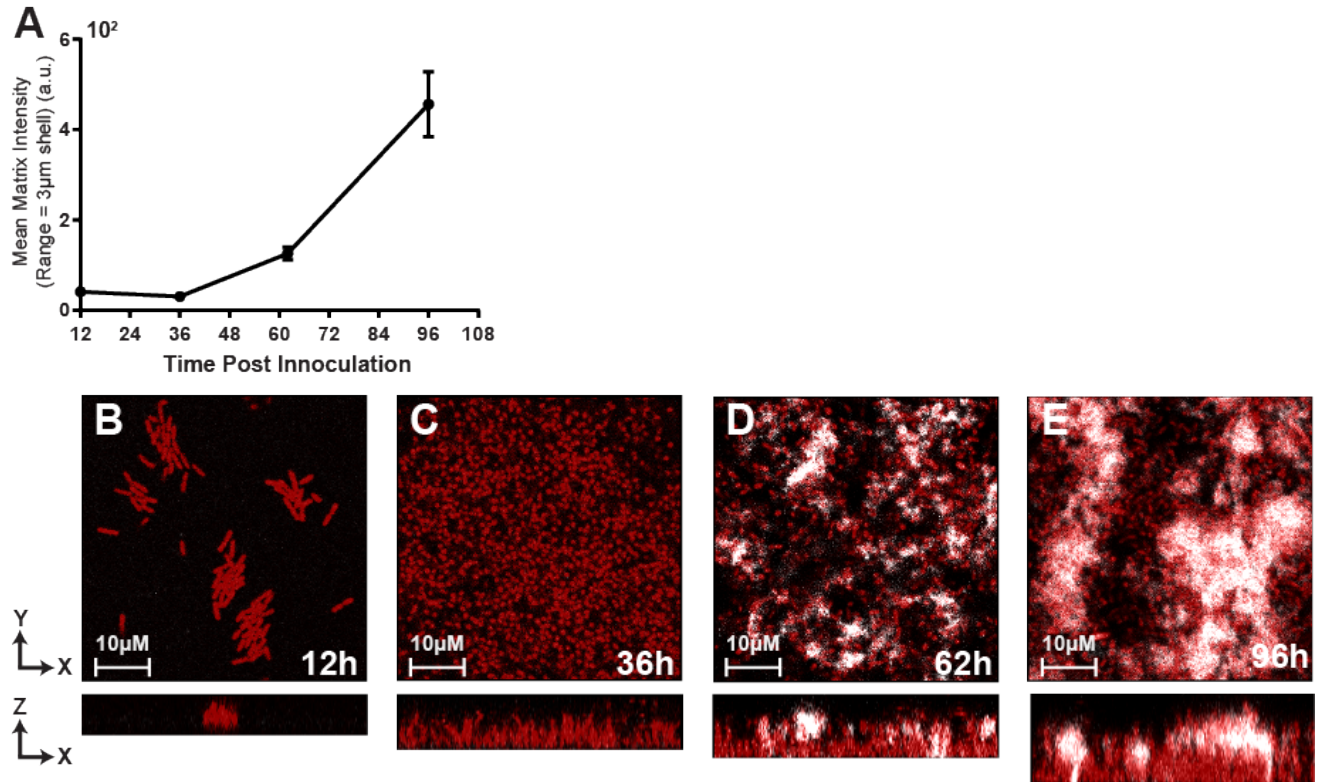

**Figure 1 – figure supplement 2. Time course imaging of *E. coli* biofilms documenting the course of curli matrix protein accumulation.** Biofilms were imaged at 12 h, 36 h, 62 h, and 96 h post inoculation and initiation of medium flow. Curli production was visualized using a strain of *E. coli* producing csgA-6xHis, allowing for immunostaining of curli protein by addition of anti-His antibodies to the influent medium. Consistent with prior work (Vidakovic *et al.* 2018), appreciable curli accumulation sufficient to block T7 phage diffusion into the biofilm interior was not consistently observed until ~60 h after the start of biofilm growth. Biofilms of this age were therefore chosen as the base resident biofilms to which phages were added prior to challenge with new invading strains of *E. coli* (see main text).
