# Supplementary material for: Matrix-trapped viruses can prevent invasion of bacterial biofilms by colonizing cells
Source: eLife journal article supplement (doi:10.7554/elife.65355), 2021-07-09
Supplement: supp [file elife_poa_e65355_Figure_2_figure_supplement_1.pdf › elife_poa_e65355_Figure_2_figure_supplement_1.pdf]

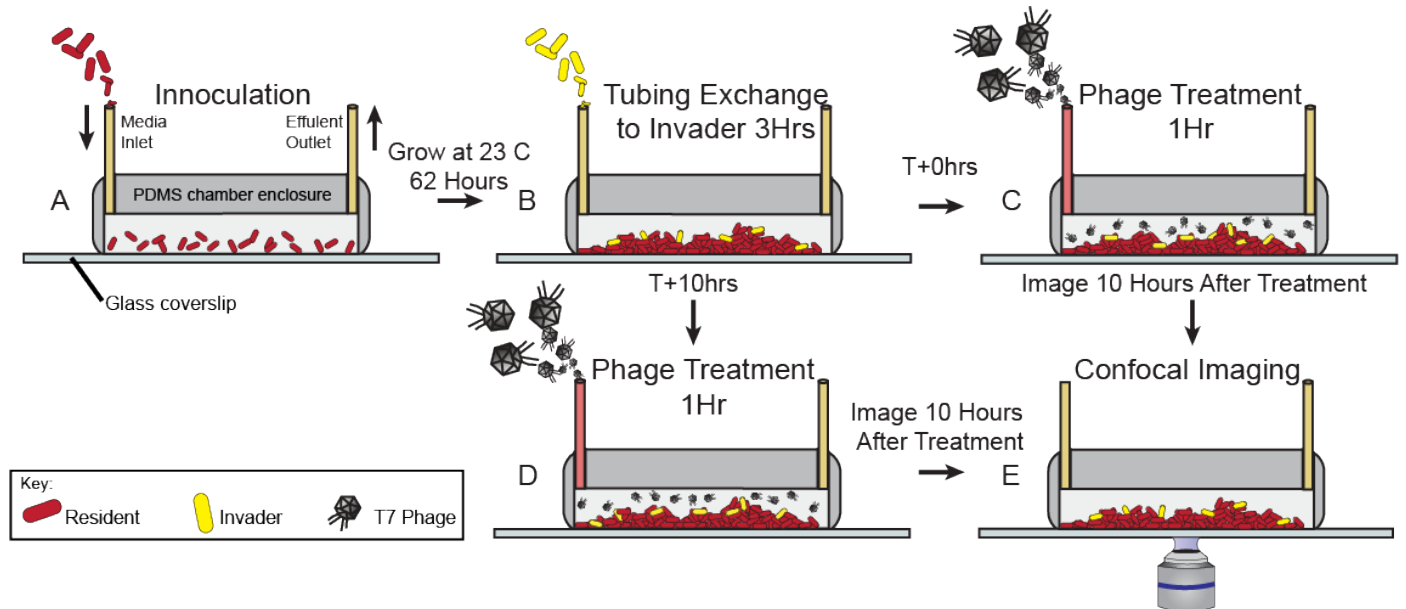

**Figure 2 – figure supplement 1. Method for phage posttreatment experiments.** (A) *E. coli* resident strain was inoculated into microfluidic devices at OD<sub>600</sub> 0.2. Cells were allotted an hour for surface attachment before a media flush was performed (40  $\mu$ L/min for 40 seconds). Biofilms were then grown at room temperature for approximately 62 hours. (B) Invading cells were then flowed into all chambers (OD<sub>600</sub> 6.0) for three hours. After the invasion, individual chambers were separated into two groups: Chambers in group C received phage treatment (2x10<sup>9</sup> PFU/mL, 0.1  $\mu$ L/min for 1 h) immediately following the yellow strain invasion. These chambers were imaged ten hours after the conclusion of the phage treatment (E). Chambers in group D were incubated at room temperature for ten hours before receiving phage treatment. Ten hours following the completion of the phage treatment, chambers in group D were imaged.
