# Supplementary material for: Matrix-trapped viruses can prevent invasion of bacterial biofilms by colonizing cells
Source: eLife journal article supplement (doi:10.7554/elife.65355), 2021-07-09
Supplement: supp [file elife_poa_e65355_Figure_3_figure_supplement_1.pdf › elife_poa_e65355_Figure_3_figure_supplement_1.pdf]

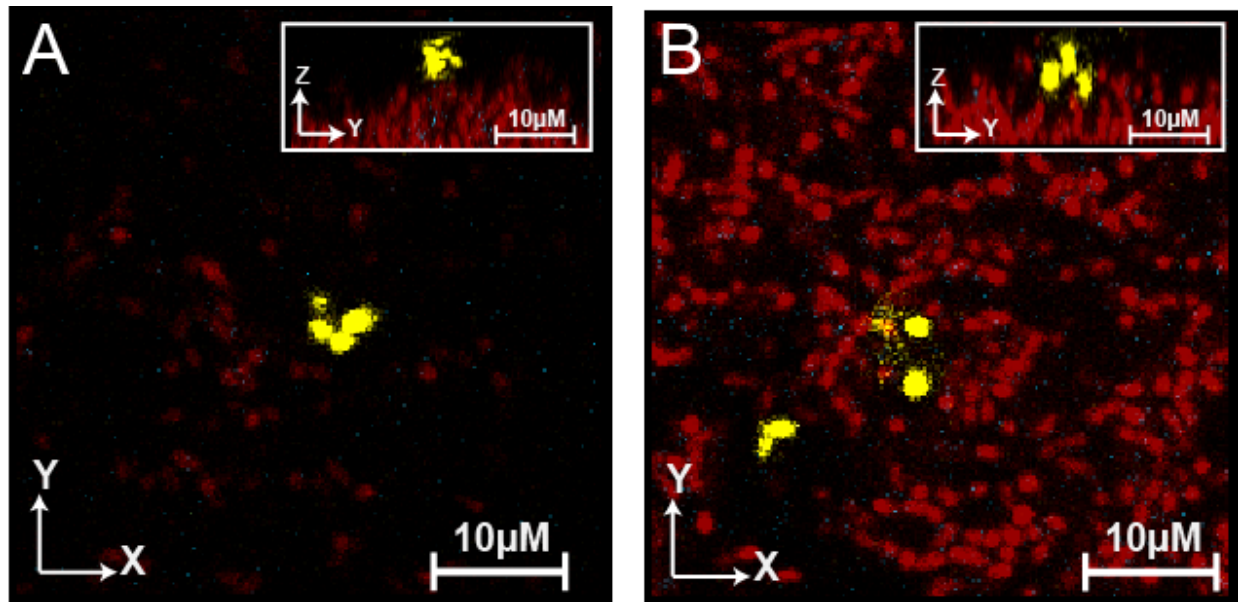

**Figure 3 – figure supplement 1. Invading cells do not produce curli matrix.** (A) Representative image of invading cells (yellow) attached to resident biofilm (red) 3 hours following the conclusion of the invasion. Invading cells encode 6xHis labeled curli monomers. No matrix was detectable by immunostaining (some noise from anti-His antibody background is visible as white/cyan dots in these images). (B) Representative image of invading cells ten hours after invasion. Again, invaders were not producing curli matrix.
