# Supplementary material for: Matrix-trapped viruses can prevent invasion of bacterial biofilms by colonizing cells
Source: eLife journal article supplement (doi:10.7554/elife.65355), 2021-07-09
Supplement: supp [file elife_poa_e65355_Figure_3_figure_supplement_2.pdf › elife_poa_e65355_Figure_3_figure_supplement_2.pdf]

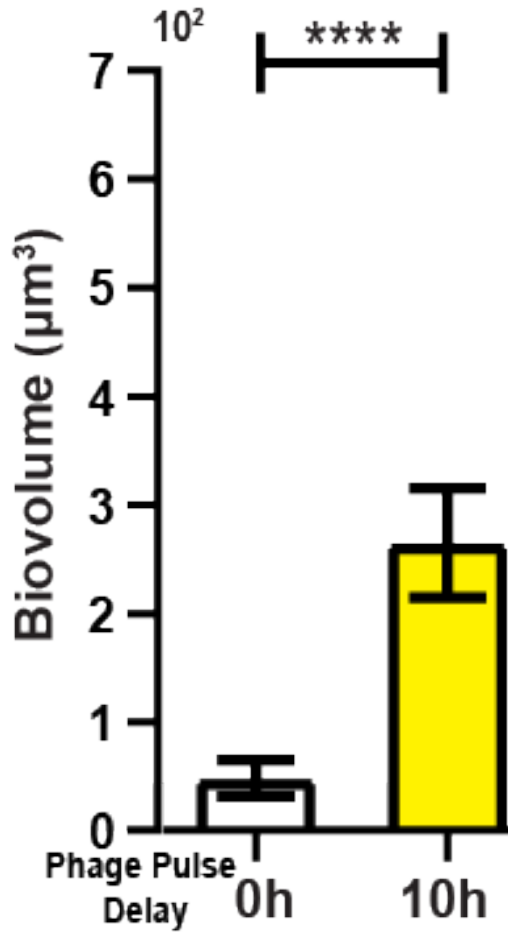

**Figure 3 – figure supplement 2. Quantification of invasion success of *E. coli* lacking the CsgB baseplate required for curli polymerization, with phage exposure post-invasion.** (A) Average invading biomass per 150 x 150 x 15μm (L, W, H) view field. Error bars represent standard error of the mean. Pairwise comparisons were performed with Mann-Whitney Signed Ranks tests with Bonferroni correction (n=7; \*\*\*\* denotes  $p < 0.00005$ ).
